# Supplementary material for: Involvement of HHV-4 (Epstein–Barr Virus) and HHV-5 (Cytomegalovirus) in Inflammatory Bowel Disease and Colorectal Cancer: A Meta-Analysis
Source: MDPI journal article supplement (doi:10.3390/cancers14205085), 2022-10-17
Supplement: s1 [file s1]

**Table S1.** Studies included in the present meta-analysis, including quantitative and qualitative assessment.

| Study                                  | Method   | Source              | Disease | Virus                                | Family                                      | Ref.  |
|----------------------------------------|----------|---------------------|---------|--------------------------------------|---------------------------------------------|-------|
| Aarnio <i>et al.</i> , 2012            | ISH      | Gastric tissue      | IBD     | HHV-5                                | <i>Herpesviridae</i>                        | [121] |
| Abdel-Moneim <i>et al.</i> , 2016      | PCR      | Colon/rectum tissue | CRC     | Bocavirus                            | Respiratory                                 | [122] |
| Abdirad <i>et al.</i> , 2007           | PCR      | Gastric tissue      | GC      | HHV-4                                | <i>Hepadnaviridae</i>                       | [123] |
| Adams <i>et al.</i> , 2016             | Record   | —                   | IBD     | HHV-3                                | <i>Herpesviridae</i>                        | [124] |
| Afzal <i>et al.</i> , 2000             | PCR      | Gastric tissue      | IBD     | Measles                              | Epithelial                                  | [125] |
| Afzal <i>et al.</i> , 1998             | Serology | Serum               | IBD     | Measles                              | Epithelial                                  | [126] |
| Aghakhani <i>et al.</i> , 2014         | PCR      | Colon/rectum tissue | CRC     | HPV                                  | <i>Papillomaviridae</i>                     | [127] |
| Ahmad <i>et al.</i> , 2019             | PCR      | Stool               | IBD     | Norovirus, Rotavirus, ADV            | Intestinal                                  | [128] |
| Akintola-Ogunremi <i>et al.</i> , 2005 | ISH      | Colon/rectum tissue | CRC     | HHV-5                                | <i>Herpesviridae</i>                        | [129] |
| Alacam                                 | PCR      | Gastric tissue      | GC      | HHV-5                                | <i>Herpesviridae</i>                        | [130] |
| Alain <i>et al.</i> , 2005             | Serology | Serum               | IBD     | HHV-5                                | <i>Herpesviridae</i>                        | [131] |
| Alipov <i>et al.</i> , 2005            | ISH      | Gastric tissue      | GC      | HHV-4                                | <i>Herpesviridae</i>                        | [132] |
| Audeau <i>et al.</i> , 2002            | ISH      | Colon/rectum tissue | CRC     | HPV                                  | <i>Papillomaviridae</i>                     | [133] |
| Axelrad <i>et al.</i> , 2018           | PCR      | Stool               | IBD     | Norovirus, Rotavirus, ADV, Sapovirus | Intestinal                                  | [134] |
| Axelrad <i>et al.</i> , 2019           | Record   | —                   | IBD     | Norovirus, Rotavirus, ADV            | Intestinal                                  | [135] |
| Balzola <i>et al.</i> , 1998           | Serology | Serum               | IBD     | Measles                              | Epithelial                                  | [136] |
| Baran <i>et al.</i> , 2018             | Serology | Serum               | IBD     | HHV-4, HHV-5                         | <i>Herpesviridae</i>                        | [137] |
| Bellaguarda <i>et al.</i> , 2015       | Serology | Serum               | IBD     | JCV                                  | <i>Polyomaviridae</i>                       | [138] |
| Bender <i>et al.</i> , 2009            | PCR      | Colon/rectum tissue | CRC     | HHV-5                                | <i>Herpesviridae</i>                        | [139] |
| Bernabe-Dones <i>et al.</i> , 2016     | PCR      | Colon/rectum tissue | CRC     | HPV                                  | <i>Papillomaviridae</i>                     | [140] |
| Bernstein <i>et al.</i> , 2007         | Serology | Serum               | IBD     | Measles, Mumps                       | Epithelial                                  | [141] |
| Bertalot <i>et al.</i> , 2001          | ISH      | Gastric tissue      | IBD     | HHV-4                                | <i>Herpesviridae</i>                        | [142] |
| Biancone <i>et al.</i> , 2001          | Serology | Serum               | IBD     | HBV, HCV                             | <i>Hepadnaviridae</i> , <i>Flaviviridae</i> | [143] |
| Bodaghi <i>et al.</i> , 2005           | PCR      | Colon/rectum tissue | CRC     | HPV                                  | <i>Papillomaviridae</i>                     | [144] |
| Boltin <i>et al.</i> , 2010            | PCR      | Gastric tissue      | IBD     | JCV                                  | <i>Polyomaviridae</i>                       | [93]  |
| Brichacek <i>et al.</i> , 1980         | Serology | Serum               | CRC     | HHV-5, HHV-1, HHV-3                  | <i>Herpesviridae</i>                        | [145] |
| Burnett-Hartman <i>et al.</i> , 2011   | Serology | Record              | CRC     | HPV                                  | <i>Papillomaviridae</i>                     | [146] |
| Burnett-Hartman <i>et al.</i> , 2012   | PCR      | Colon/rectum tissue | CRC     | HPV                                  | <i>Papillomaviridae</i>                     | [147] |
| Burnett-Hartman <i>et al.</i> , 2013   | PCR      | Colon/rectum tissue | CRC     | HPV                                  | <i>Papillomaviridae</i>                     | [148] |
| Butt <i>et al.</i> , 2016              | Serology | Serum               | CRC     | JCV, PyV6                            | <i>Polyomaviridae</i>                       | [149] |

|                                          |          |                     |     |              |                                                |       |
|------------------------------------------|----------|---------------------|-----|--------------|------------------------------------------------|-------|
| Campello <i>et al.</i> , 2010            | PCR      | Colon/rectum tissue | CRC | SV40, BKV    | <i>Polyomaviridae</i>                          | [150] |
| Campello <i>et al.</i> , 2011            | PCR      | Colon/rectum tissue | CRC | MCPV         | <i>Herpesviridae</i>                           | [151] |
| Cardenas-Mondragon <i>et al.</i> , 2015  | Serology | Serum               | GC  | HHV-4        | <i>Herpesviridae</i>                           | [152] |
| Carrascal <i>et al.</i> , 2003           | ISH      | Gastric tissue      | GC  | HHV-4        | <i>Herpesviridae</i>                           | [153] |
| Casini <i>et al.</i> , 2005              | ISH      | Colon/rectum tissue | CRC | JCV, BKV     | <i>Polyomaviridae</i>                          | [154] |
| Chan <i>et al.</i> , 2016                | Serology | Serum               | IBD | HBV          | <i>Hepadnaviridae</i>                          | [155] |
| Chen <i>et al.</i> , 2016a               | PCR      | Colon/rectum tissue | CRC | HHV-5        | <i>Herpesviridae</i>                           | [156] |
| Chen <i>et al.</i> , 2016b               | PCR      | Colon/rectum tissue | CRC | HHV-5        | <i>Herpesviridae</i>                           | [157] |
| Chen <i>et al.</i> , 2017                | Record   | —                   | IBD | HBV, HCV     | <i>Hepadnaviridae</i> ,<br><i>Flaviviridae</i> | [158] |
| Chevaux <i>et al.</i> , 2010             | Serology | Serum               | IBD | HBV, HCV     | <i>Hepadnaviridae</i> ,<br><i>Flaviviridae</i> | [159] |
| Cho <i>et al.</i> , 2001                 | ISH      | Colon/rectum tissue | CRC | HHV-4        | <i>Herpesviridae</i>                           | [160] |
| Coelho <i>et al.</i> , 2013              | PCR      | Colon/rectum tissue | CRC | JCV          | <i>Polyomaviridae</i>                          | [161] |
| Cohen <i>et al.</i> , 2018               | ISH      | Colon/rectum tissue | IBD | HHV-5        | <i>Herpesviridae</i>                           | [162] |
| Dalla Libera <i>et al.</i> , 2020        | PCR      | Colon/rectum tissue | CRC | HPV          | <i>Papillomaviridae</i>                        | [163] |
| Damin <i>et al.</i> , 2007               | PCR      | Colon/rectum tissue | CRC | HPV          | <i>Papillomaviridae</i>                        | [100] |
| De Francisco <i>et al.</i> , 2018        | Serology | Serum               | IBD | HHV-4        | <i>Herpesviridae</i>                           | [164] |
| de Lima <i>et al.</i> , 2012             | PCR      | Gastric tissue      | GC  | HHV-4        | <i>Herpesviridae</i>                           | [165] |
| de Saussure <i>et al.</i> , 2004         | Serology | Serum               | IBD | HHV-5        | <i>Herpesviridae</i>                           | [166] |
| de Souza <i>et al.</i> , 2018            | ISH      | Gastric tissue      | GC  | HHV-4, HPV   | <i>Herpesviridae</i>                           | [167] |
| de Villiers <i>et al.</i> , 2002         | ISH      | Colon/rectum tissue | CRC | TTV          | <i>Anelloviridae</i>                           | [168] |
| de Villiers <i>et al.</i> , 2007         | PCR      | Colon/rectum tissue | CRC | TTV          | <i>Anelloviridae</i>                           | [169] |
| Del Moral-Hernandez <i>et al.</i> , 2019 | PCR      | Gastric tissue      | GC  | HHV-4, HHV-5 | <i>Herpesviridae</i>                           | [170] |
| Deschoolmeester <i>et al.</i> , 2010     | PCR      | Colon/rectum tissue | CRC | HPV          | <i>Papillomaviridae</i>                        | [171] |
| Dimitroulia <i>et al.</i> , 2006         | ISH      | Gastric tissue      | IBD | HHV-5        | <i>Herpesviridae</i>                           | [172] |
| Dimitroulia <i>et al.</i> , 2013         | PCR      | Gastric tissue      | IBD | HHV-4        | <i>Herpesviridae</i>                           | [173] |
| Dimberg <i>et al.</i> , 2013             | PCR      | Colon/rectum tissue | CRC | HHV-5        | <i>Herpesviridae</i>                           | [174] |
| do Carmo <i>et al.</i> , 2014            | PCR      | Stools              | IBD | HHV-5        | <i>Herpesviridae</i>                           | [175] |
| El-Matary <i>et al.</i> ,                | PCR      | Colon/rectum        | IBD | HHV-5        | <i>Herpesviridae</i>                           | [176] |

|                                   |          |                     |     |                                           |                                                                         |       |
|-----------------------------------|----------|---------------------|-----|-------------------------------------------|-------------------------------------------------------------------------|-------|
| 2018                              |          | tissue              |     |                                           |                                                                         |       |
| Enam <i>et al.</i> , 2002         | PCR/ISH  | Colon/rectum tissue | CRC | JCV                                       | <i>Polyomaviridae</i>                                                   | [177] |
| Esmailzadeh <i>et al.</i> , 2020  | PCR      | Colon/rectum tissue | CRC | JCV                                       | <i>Polyomaviridae</i>                                                   | [178] |
| Eyre-Brook <i>et al.</i> , 1986   | ISH      | Colon/rectum tissue | IBD | HHV-5                                     | <i>Herpesviridae</i>                                                    | [179] |
| Fahal <i>et al.</i> , 1995        | Serology | Serum               | GC  | HIV, HBV                                  | <i>Retroviridae</i> ,<br><i>Hepadnaviridae</i>                          | [180] |
| Farmer <i>et al.</i> , 1973       | Serology | Serum               | IBD | Mumps, ADV, Reovirus, HHV-5, HHV-1, HHV-3 | Epithelial, respiratory, intestinal,<br><i>Herpesviridae</i>            | [181] |
| Fernandes <i>et al.</i> , 2019    | Virome   | Stool               | IBD | <i>Caudovirales</i>                       | Phages                                                                  | [50]  |
| Fiorina <i>et al.</i> , 2014      | PCR      | Colon/rectum tissue | CRC | HHV-4                                     | <i>Herpesviridae</i>                                                    | [182] |
| Flores <i>et al.</i> , 2014       | PCR      | Serum               | IBD | BKV                                       | <i>Polyomaviridae</i>                                                   | [183] |
| Gauss <i>et al.</i> , 2015        | Record   | —                   | IBD | HHV-5                                     | <i>Herpesviridae</i>                                                    | [184] |
| Gazzaz <i>et al.</i> , 2016       | PCR      | Colon/rectum tissue | CRC | HPV                                       | <i>Papillomaviridae</i>                                                 | [185] |
| Genitsch <i>et al.</i> , 2015     | ISH      | Gastric tissue      | GC  | HHV-4                                     | <i>Herpesviridae</i>                                                    | [186] |
| Giuliani <i>et al.</i> , 2008     | PCR      | Colon/rectum tissue | CRC | SV40, JCV, BKV                            | <i>Polyomaviridae</i>                                                   | [187] |
| Goel <i>et al.</i> , 2006         | PCR      | Colon/rectum tissue | CRC | JCV                                       | <i>Polyomaviridae</i>                                                   | [188] |
| Gong <i>et al.</i> , 2019         | Record   | —                   | IBD | HHV-4                                     | <i>Herpesviridae</i>                                                    | [189] |
| Gonzalez <i>et al.</i> , 2015     | Serology | Serum               | CRC | HCV                                       | <i>Flaviviridae</i>                                                     | [190] |
| Gordon <i>et al.</i> , 2016       | Record   | —                   | IBD | HHV-4                                     | <i>Herpesviridae</i>                                                    | [191] |
| Gornick <i>et al.</i> , 2010      | PCR      | Colon/rectum tissue | CRC | HPV                                       | <i>Papillomaviridae</i>                                                 | [192] |
| Green <i>et al.</i> , 1981        | ISH      | Colon/rectum tissue | CRC | HPV                                       | <i>Papillomaviridae</i>                                                 | [193] |
| Greenberg <i>et al.</i> , 1978    | Serology | Serum               | IBD | Rotavirus                                 | Intestinal                                                              | [194] |
| Grinstein <i>et al.</i> , 2002    | ISH      | Colon/rectum tissue | CRC | HHV-4                                     | <i>Herpesviridae</i>                                                    | [195] |
| Gupta <i>et al.</i> , 2020        | PCR      | Colon/rectum tissue | CRC | HPV                                       | <i>Papillomaviridae</i>                                                 | [196] |
| Haga <i>et al.</i> , 1996         | PCR      | Gastric tissue      | IBD | Measles, Mumps, Rubella                   | Epithelial                                                              | [197] |
| Haghi-Navand <i>et al.</i> , 2019 | PCR      | Colon/rectum tissue | CRC | JCV                                       | <i>Polyomaviridae</i>                                                   | [198] |
| Hamada <i>et al.</i> , 2014       | Record   | —                   | CRC | HIV                                       | <i>Retroviridae</i>                                                     | [199] |
| Hampras <i>et al.</i> , 2014      | Serology | Serum               | CRC | JCV                                       | <i>Polyomaviridae</i>                                                   | [200] |
| Hannigan <i>et al.</i> , 2018     | Virome   | Stool               | CRC | <i>Caudovirales</i>                       | Phages                                                                  | [52]  |
| Harkins <i>et al.</i> , 2002      | ISH      | Colon/rectum tissue | CRC | HHV-5                                     | <i>Herpesviridae</i>                                                    | [201] |
| Harsh <i>et al.</i> , 2017        | Record   | —                   | IBD | HBV, HCV, HIV                             | <i>Hepadnaviridae</i> ,<br><i>Flaviviridae</i> ,<br><i>Retroviridae</i> | [202] |

|                                       |          |                     |     |                       |                                                                  |       |
|---------------------------------------|----------|---------------------|-----|-----------------------|------------------------------------------------------------------|-------|
| Hart <i>et al.</i> , 1982             | ISH      | Colon/rectum tissue | CRC | HHV-5                 | <i>Herpesviridae</i>                                             | [203] |
| Hayashi <i>et al.</i> , 1996          | ISH      | Gastric tissue      | GC  | HHV-4                 | <i>Herpesviridae</i>                                             | [204] |
| He <i>et al.</i> , 2015               | Serology | Serum               | IBD | HBV                   | <i>Hepadnaviridae</i>                                            | [205] |
| Hernandez-Losa <i>et al.</i> , 2003   | PCR      | Colon/rectum tissue | CRC | JCV                   | <i>Polyomaviridae</i>                                            | [206] |
| Herrera-Goepfert <i>et al.</i> , 2005 | ISH      | Gastric tissue      | GC  | HHV-4                 | <i>Herpesviridae</i>                                             | [207] |
| Hirata <i>et al.</i> , 2007           | Record   | —                   | CRC | HTLV-I                | <i>Retroviridae</i>                                              | [208] |
| Hori <i>et al.</i> , 2005             | PCR      | Colon/rectum tissue | CRC | JCV                   | <i>Polyomaviridae</i>                                            | [209] |
| Hradsky <i>et al.</i> , 2015          | PCR      | Serum               | IBD | HHV-4                 | <i>Herpesviridae</i>                                             | [210] |
| Hsieh <i>et al.</i> , 1998            | PCR      | Gastric tissue      | GC  | HHV-4                 | <i>Herpesviridae</i>                                             | [211] |
| Huang <i>et al.</i> , 1978            | ISH      | Colon/rectum tissue | CRC | HHV-5                 | <i>Herpesviridae</i>                                             | [212] |
| Iizuka <i>et al.</i> , 2001           | Serology | Serum               | IBD | Mumps                 | Epithelial                                                       | [213] |
| Ito <i>et al.</i> , 1992              | Serology | Serum               | CRC | IMV                   | Epithelial                                                       | [214] |
| Jarzynski <i>et al.</i> , 2017        | PCR      | Colon/rectum tissue | CRC | HPV, BKV              | <i>Papillomaviridae</i> ,<br><i>Polyomaviridae</i>               | [215] |
| Jung <i>et al.</i> , 2008             | PCR      | Colon/rectum tissue | CRC | JCV                   | <i>Polyomaviridae</i>                                            | [216] |
| Jung <i>et al.</i> , 2019             | Serology | Serum               | CRC | HBV, HCV              | <i>Hepadnaviridae</i> ,<br><i>Flaviviridae</i>                   | [217] |
| Kambham <i>et al.</i> , 2004          | ISH      | Colon/rectum tissue | IBD | HHV-5                 | <i>Herpesviridae</i>                                             | [218] |
| Kamiza <i>et al.</i> , 2016           | Record   | —                   | CRC | HBV, HCV              | <i>Hepadnaviridae</i> ,<br><i>Flaviviridae</i>                   | [219] |
| Kane <i>et al.</i> , 1971             | Serology | Serum               | IBD | HHV-4                 | <i>Herpesviridae</i>                                             | [220] |
| Karbalaie-Niya <i>et al.</i> , 2018   | PCR      | Colon/rectum tissue | CRC | MCPV                  | <i>Polyomaviridae</i>                                            | [221] |
| Karim <i>et al.</i> , 2003            | ISH      | Gastric tissue      | GC  | HHV-4                 | <i>Herpesviridae</i>                                             | [222] |
| Karpinski <i>et al.</i> , 2011        | PCR      | Colon/rectum tissue | CRC | HHV-4, JCV, KSHV, ADV | <i>Herpesviridae</i> ,<br><i>Polyomaviridae</i> ,<br>respiratory | [223] |
| Kattoor <i>et al.</i> , 2002          | ISH      | Gastric tissue      | GC  | HHV-4                 | <i>Herpesviridae</i>                                             | [224] |
| Kawashima <i>et al.</i> , 2000        | PCR      | Serum               | IBD | Measles               | Epithelial                                                       | [225] |
| Kayamba <i>et al.</i> , 2016          | Serology | Serum               | GC  | HHV-4                 | <i>Herpesviridae</i>                                             | [226] |
| Keller <i>et al.</i> , 2014           | Record   | —                   | CRC | HIV                   | <i>Retroviridae</i>                                              | [227] |
| Khabaz <i>et al.</i> , 2016b          | PCR      | Colon/rectum tissue | CRC | SV40                  | <i>Polyomaviridae</i>                                            | [228] |
| Kiewe <i>et al.</i> , 2009            | Serology | Serum               | CRC | HHV-5                 | <i>Herpesviridae</i>                                             | [229] |
| Kim <i>et al.</i> , 2010              | ISH      | Colon/rectum tissue | IBD | HHV-5                 | <i>Herpesviridae</i>                                             | [230] |
| Kim <i>et al.</i> , 2014              | Serology | Serum               | IBD | HBV                   | <i>Hepadnaviridae</i>                                            | [231] |
| Kirgan <i>et al.</i> , 1990           | ISH      | Colon/rectum tissue | CRC | HPV                   | <i>Papillomaviridae</i>                                          | [99]  |
| Kishore <i>et al.</i> , 2004          | Serology | Serum               | IBD | HHV-5                 | <i>Herpesviridae</i>                                             | [232] |
| Knoell <i>et al.</i> , 2005           | Serology | Serum               | IBD | HBV, HCV              | <i>Hepadnaviridae</i>                                            | [233] |

|                                          |          |                     |         |                            |                                                |       |
|------------------------------------------|----------|---------------------|---------|----------------------------|------------------------------------------------|-------|
|                                          |          |                     |         |                            | <i>Flaviviridae</i>                            |       |
| Knosel <i>et al.</i> , 2004              | PCR      | Colon/rectum tissue | CRC     | HHV-5                      | <i>Herpesviridae</i>                           | [234] |
| Knosel <i>et al.</i> , 2009              | PCR      | Colon/rectum tissue | IBD     | HHV-4, HHV-5, HHV-1, HHV-6 | <i>Herpesviridae</i>                           | [235] |
| Kocoglu <i>et al.</i> , 2016             | Serology | Serum               | CRC     | HBV, HCV                   | <i>Hepadnaviridae</i> ,<br><i>Flaviviridae</i> | [236] |
| Kojima <i>et al.</i> , 2006              | Record   | —                   | IBD     | HHV-4                      | <i>Herpesviridae</i>                           | [237] |
| Kolho <i>et al.</i> , 2012               | PCR      | Stool               | IBD     | Norovirus                  | Intestinal                                     | [238] |
| Kong <i>et al.</i> , 2007                | PCR      | Colon/rectum tissue | CRC     | HPV                        | <i>Papillomaviridae</i>                        | [239] |
| Ksiaa <i>et al.</i> , 2010               | PCR      | Gastric tissue      | GC      | JCV                        | <i>Polyomaviridae</i>                          | [240] |
| Ksiaa <i>et al.</i> , 2015               | PCR      | Colon/rectum tissue | CRC     | JCV                        | <i>Polyomaviridae</i>                          | [241] |
| Laghi <i>et al.</i> , 1999               | PCR      | Colon/rectum tissue | CRC     | JCV                        | <i>Polyomaviridae</i>                          | [242] |
| Lavy <i>et al.</i> , 2001                | Serology | Serum               | IBD     | Measles                    | Epithelial                                     | [243] |
| Lee <i>et al.</i> , 2001                 | PCR      | Colon/rectum tissue | CRC     | HPV                        | <i>Papillomaviridae</i>                        | [244] |
| Leveque <i>et al.</i> , 2010             | PCR      | Colon/rectum tissue | IBD     | HHV-5                      | <i>Herpesviridae</i>                           | [245] |
| Li <i>et al.</i> , 2007                  | ISH      | Colon/rectum tissue | CRC     | Parvo B19                  | Epithelial                                     | [246] |
| Li <i>et al.</i> , 2019                  | PCR      | Gastric tissue      | IBD     | HHV-4                      | <i>Herpesviridae</i>                           | [75]  |
| Lin <i>et al.</i> , 2008                 | PCR      | Colon/rectum tissue | CRC     | JCV                        | <i>Polyomaviridae</i>                          | [247] |
| Liu <i>et al.</i> , 2011                 | PCR      | Colon/rectum tissue | CRC     | HPV                        | <i>Papillomaviridae</i>                        | [248] |
| Lu <i>et al.</i> , 2018                  | Serology | Serum               | CRC     | HBV                        | <i>Hepadnaviridae</i>                          | [249] |
| Lundstig <i>et al.</i> , 2007            | Serology | Serum               | CRC     | JCV, BKV                   | <i>Polyomaviridae</i>                          | [250] |
| Lv <i>et al.</i> , 2020                  | Serology | Gastric tissue      | IBD     | HHV-5                      | <i>Herpesviridae</i>                           | [251] |
| MacKey <i>et al.</i> , 1979              | ISH      | Colon/rectum tissue | CRC     | ADV                        | Respiratory                                    | [252] |
| Maconi <i>et al.</i> , 2005              | ISH      | Colon/rectum tissue | IBD     | HHV-5                      | <i>Herpesviridae</i>                           | [253] |
| Malekpour <i>et al.</i> , 2018           | PCR      | Colon/rectum tissue | CRC     | HPV                        | <i>Papillomaviridae</i>                        | [254] |
| Mariguela <i>et al.</i> , 2008           | PCR      | Colon/rectum tissue | CRC/IBD | HHV-4, HHV-5               | <i>Herpesviridae</i>                           | [255] |
| Mehrabani-Khasraghi <i>et al.</i> , 2016 | PCR      | Colon/rectum tissue | CRC     | HHV-4, HHV-5, HHV-1        | <i>Herpesviridae</i>                           | [256] |
| Militello <i>et al.</i> , 2009           | PCR      | Colon/rectum tissue | CRC     | HHV-4, HHV-5, HPV          | Multiple                                       | [257] |
| Montgomery <i>et al.</i> , 1999          | Record   | —                   | IBD     | Measles, Mumps, HHV-3      | Epithelial                                     | [258] |
| Morewaya <i>et al.</i> , 2004            | ISH      | Gastric tissue      | GC      | HHV-4                      | <i>Herpesviridae</i>                           | [259] |
| Mou <i>et al.</i> , 2012                 | PCR      | Colon/rectum tissue | CRC     | JCV                        | <i>Polyomaviridae</i>                          | [260] |
| Nakatsu <i>et al.</i> , 2018             | Virome   | Stool               | CRC     | Inovirus, Tunalikevirus,   | Epithelial                                     | [51]  |

|                                     |          |                     |     |                     |                                                 |       |
|-------------------------------------|----------|---------------------|-----|---------------------|-------------------------------------------------|-------|
|                                     |          |                     |     | Bunyavirus          |                                                 |       |
| Newcomb <i>et al.</i> , 2004        | PCR      | Colon/rectum tissue | CRC | JCV                 | <i>Polyomaviridae</i>                           | [261] |
| Niv <i>et al.</i> , 2010            | PCR      | Colon/rectum tissue | CRC | JCV                 | <i>Polyomaviridae</i>                           | [262] |
| Norman <i>et al.</i> , 2015         | Virome   | Stool               | IBD | <i>Caudovirales</i> | Phages                                          | [38]  |
| Nosho <i>et al.</i> , 2009          | PCR      | Colon/rectum tissue | CRC | JCV                 | <i>Polyomaviridae</i>                           | [263] |
| Nosrati <i>et al.</i> , 2015        | PCR      | Colon/rectum tissue | CRC | HPV                 | <i>Papillomaviridae</i>                         | [264] |
| Oda <i>et al.</i> , 2003            | ISH      | Gastric tissue      | GC  | HHV-4               | <i>Herpesviridae</i>                            | [265] |
| Perez <i>et al.</i> , 2005          | PCR      | Colon/rectum tissue | CRC | HPV                 | <i>Papillomaviridae</i>                         | [266] |
| Perez-Brocal <i>et al.</i> , 2013   | Virome   | Stool               | IBD | <i>Caudovirales</i> | Phages                                          | [48]  |
| Perez-Brocal <i>et al.</i> , 2015   | Virome   | Stool               | IBD | <i>Caudovirales</i> | Phages                                          | [49]  |
| Pironi <i>et al.</i> , 2009         | PCR      | Colon/rectum tissue | IBD | Parvo B19           | Epithelial                                      | [267] |
| Roblin <i>et al.</i> , 2011         | ISH      | Gastric tissue      | IBD | HHV-5               | <i>Herpesviridae</i>                            | [268] |
| Roblin <i>et al.</i> , 2012         | Serology | Serum               | IBD | HHV-5               | <i>Herpesviridae</i>                            | [269] |
| Roche <i>et al.</i> , 1981          | ISH      | Colon/rectum tissue | CRC | HHV-5               | <i>Herpesviridae</i>                            | [270] |
| Rollison <i>et al.</i> , 2009       | PCR      | Colon/rectum tissue | CRC | JCV                 | <i>Polyomaviridae</i>                           | [271] |
| Ruger <i>et al.</i> , 1985          | ISH      | Colon/rectum tissue | CRC | HHV-5               | <i>Herpesviridae</i>                            | [272] |
| Ryan <i>et al.</i> , 2012           | PCR      | Gastric tissue      | IBD | HHV-4               | <i>Herpesviridae</i>                            | [73]  |
| Salepci <i>et al.</i> , 2009        | PCR      | Colon/rectum tissue | CRC | HPV                 | <i>Papillomaviridae</i>                         | [273] |
| Samaka <i>et al.</i> , 2013         | ISH      | Colon/rectum tissue | CRC | JCV                 | <i>Polyomaviridae</i>                           | [274] |
| Sarvari <i>et al.</i> , 2018        | PCR      | Colon/rectum tissue | CRC | HHV-4, JCV          | <i>Herpesviridae</i> ,<br><i>Polyomaviridae</i> | [275] |
| Schildgen <i>et al.</i> , 2013      | PCR      | Colon/rectum tissue | CRC | Bocavirus           | Respiratory                                     | [276] |
| Shah <i>et al.</i> , 1992           | PCR      | Colon/rectum tissue | CRC | HPV                 | <i>Papillomaviridae</i>                         | [277] |
| Shibata <i>et al.</i> , 1993        | PCR      | Gastric tissue      | GC  | HHV-4               | <i>Herpesviridae</i>                            | [278] |
| Sinagra <i>et al.</i> , 2014        | PCR      | Colon/rectum tissue | CRC | JCV                 | <i>Polyomaviridae</i>                           | [279] |
| Su <i>et al.</i> , 2020             | Record   | —                   | CRC | HBV                 | <i>Hepadnaviridae</i>                           | [280] |
| Sura <i>et al.</i> , 2010           | PCR      | Gastric tissue      | IBD | HHV6                | <i>Herpesviridae</i>                            | [281] |
| Tafvizi <i>et al.</i> , 2014        | PCR      | Colon/rectum tissue | CRC | HHV-5               | <i>Herpesviridae</i>                            | [282] |
| Tafvizi <i>et al.</i> , 2015        | PCR      | Colon/rectum tissue | CRC | HHV-4               | <i>Herpesviridae</i>                            | [283] |
| Taherian <i>et al.</i> , 2014       | PCR      | Colon/rectum tissue | CRC | HPV                 | <i>Papillomaviridae</i>                         | [284] |
| Theodoropoulos <i>et al.</i> , 2005 | PCR      | Colon/rectum tissue | CRC | JCV                 | <i>Polyomaviridae</i>                           | [285] |
| Tolentino <i>et al.</i> ,           | Serology | Serum               | IBD | HBV                 | <i>Hepadnaviridae</i>                           | [286] |

2008

|                                 |              |                                  |     |                        |                                               |       |
|---------------------------------|--------------|----------------------------------|-----|------------------------|-----------------------------------------------|-------|
| Toumi <i>et al.</i> , 2017      | PCR          | Colon/rectum tissue              | CRC | JCV                    | <i>Polyomaviridae</i>                         | [287] |
| Trimeche <i>et al.</i> , 2009   | PCR          | Gastric tissue                   | GC  | HHV-4                  | <i>Herpesviridae</i>                          | [288] |
| Truong <i>et al.</i> , 2009     | ISH          | Gastric tissue                   | GC  | HHV-4                  | <i>Herpesviridae</i>                          | [289] |
| Tsai <i>et al.</i> , 2015       | Record       | —                                | IBD | HHV-3                  | <i>Herpesviridae</i>                          | [290] |
| Ungaro <i>et al.</i> , 2019     | Virome       | Record                           | IBD | Multiple herpesviruses | <i>Herpesviridae</i>                          | [54]  |
| Vanoli <i>et al.</i> , 2017     | ISH          | Gastric tissue                   | IBD | HHV-4                  | <i>Herpesviridae</i>                          | [291] |
| Vega <i>et al.</i> , 1999       | ISH          | Gastric tissue                   | IBD | HHV-5                  | <i>Herpesviridae</i>                          | [292] |
| Vilkin <i>et al.</i> , 2012     | ISH          | Colon/rectum tissue              | CRC | JCV                    | <i>Polyomaviridae</i>                         | [293] |
| Wagner <i>et al.</i> , 2013     | Virome       | Gastric tissue                   | IBD | <i>Caudovirales</i>    | Phages                                        | [53]  |
| Wakefield <i>et al.</i> , 1992  | PCR          | Gastric tissue                   | IBD | HHV-4, HHV-5, HHV-6    | <i>Herpesviridae</i>                          | [294] |
| Weinreb <i>et al.</i> , 2006    | ISH          | Colon/rectum tissue              | CRC | JCV                    | <i>Polyomaviridae</i>                         | [295] |
| Wong <i>et al.</i> , 2003       | ISH          | Colon/rectum tissue              | CRC | HHV-4                  | <i>Herpesviridae</i>                          | [296] |
| Yanai <i>et al.</i> , 1997      | ISH          | Gastric tissue                   | GC  | HHV-4                  | <i>Herpesviridae</i>                          | [297] |
| Yanai <i>et al.</i> , 1999      | ISH          | Colon/rectum tissue              | IBD | HHV-4                  | <i>Herpesviridae</i>                          | [298] |
| Yavuzer <i>et al.</i> , 2011    | PCR          | Colon/rectum tissue              | CRC | HPV                    | <i>Papillomaviridae</i>                       | [299] |
| Yi <i>et al.</i> , 2013         | PCR/Serology | Serum                            | IBD | HHV-5                  | <i>Herpesviridae</i>                          | [300] |
| Yuen <i>et al.</i> , 1994       | ISH          | Colon/rectum tissue              | CRC | HHV-4                  | <i>Herpesviridae</i>                          | [301] |
| Yunos <i>et al.</i> , 2006      | ISH          | Gastric tissue                   | GC  | HHV-4                  | <i>Herpesviridae</i>                          | [302] |
| Zagorowicz <i>et al.</i> , 2016 | ISH          | Colon/rectum tissue              | IBD | HHV-5                  | <i>Herpesviridae</i>                          | [303] |
| Zapatka <i>et. al.</i> , 2020   | Virome       | Gastric and Colon/rectum tissues | GC  | HHV-4<br>HBV           | <i>Herpesviridae</i><br><i>Hepadnaviridae</i> | [55]  |

---

**Table S2.** NOS scores of the studies included in the present meta-analysis, including quantitative and qualitative assessment.

| Author                                   | Representative<br>ness | Control group | Documentation | Outcome | Absence of co-<br>infections | Score    |
|------------------------------------------|------------------------|---------------|---------------|---------|------------------------------|----------|
| Aarnio <i>et al.</i> , 2012              | No                     | No            | Yes           | Yes     | Yes                          | Moderate |
| Abdel-Moneim <i>et al.</i> , 2016        | Yes                    | No            | Yes           | Yes     | Yes                          | Moderate |
| Abdirad <i>et al.</i> , 2007             | Yes                    | No            | Yes           | Yes     | No                           | Moderate |
| Adams <i>et al.</i> , 2016               | Yes                    | No            | Yes           | Yes     | Yes                          | Moderate |
| Afzal <i>et al.</i> , 2000               | No                     | No            | Yes           | Yes     | Yes                          | Moderate |
| Afzal <i>et al.</i> , 1998               | No                     | Yes           | Yes           | Yes     | Yes                          | Moderate |
| Aghakhani <i>et al.</i> , 2014           | Yes                    | No            | Yes           | Yes     | Yes                          | Moderate |
| Ahmad <i>et al.</i> , 2019               | Yes                    | No            | Yes           | Yes     | Yes                          | Moderate |
| Akintola-Ogunremi <i>et al.</i> , 2005   | Yes                    | Yes           | No            | Yes     | Yes                          | Moderate |
| Alacam <i>et al.</i> , 2021              | Yes                    | No            | Yes           | Yes     | Yes                          | Moderate |
| Alain <i>et al.</i> , 2005               | Yes                    | No            | Yes           | Yes     | Yes                          | Moderate |
| Alipov <i>et al.</i> , 2005              | Yes                    | No            | Yes           | Yes     | Yes                          | Moderate |
| Audeau <i>et al.</i> , 2002              | No                     | No            | Yes           | Yes     | Yes                          | Moderate |
| Axelrad <i>et al.</i> , 2018             | Yes                    | Yes           | Yes           | Yes     | Yes                          | High     |
| Axelrad <i>et al.</i> , 2019             | Yes                    | Yes           | Yes           | Yes     | Yes                          | High     |
| Balzola <i>et al.</i> , 1998             | Yes                    | Yes           | Yes           | Yes     | Yes                          | High     |
| Baran <i>et al.</i> , 2018               | No                     | No            | Yes           | Yes     | Yes                          | Moderate |
| Bellaguarda <i>et al.</i> , 2015         | Yes                    | No            | Yes           | Yes     | Yes                          | Moderate |
| Bender <i>et al.</i> , 2009              | Yes                    | No            | Yes           | Yes     | Yes                          | Moderate |
| Bernabe-Dones <i>et al.</i> , 2016       | Yes                    | Yes           | Yes           | Yes     | Yes                          | High     |
| Bernstein <i>et al.</i> , 2007           | Yes                    | Yes           | Yes           | Yes     | Yes                          | High     |
| Bertalot <i>et al.</i> , 2001            | No                     | No            | Yes           | Yes     | No                           | Low      |
| Biancone <i>et al.</i> , 2001            | Yes                    | Yes           | Yes           | Yes     | Yes                          | High     |
| Bodaghi <i>et al.</i> , 2005             | Yes                    | Yes           | Yes           | Yes     | Yes                          | High     |
| Boltin <i>et al.</i> , 2010              | No                     | Yes           | Yes           | Yes     | Yes                          | Moderate |
| Brichacek <i>et al.</i> , 1980           | No                     | Yes           | Yes           | Yes     | Yes                          | Moderate |
| Burnett-Hartman <i>et al.</i> , 2011     | Yes                    | No            | Yes           | Yes     | Yes                          | Moderate |
| Burnett-Hartman <i>et al.</i> , 2012     | Yes                    | Yes           | No            | Yes     | Yes                          | Moderate |
| Burnett-Hartman <i>et al.</i> , 2013     | Yes                    | Yes           | Yes           | Yes     | Yes                          | High     |
| Butt <i>et al.</i> , 2016                | Yes                    | Yes           | Yes           | Yes     | Yes                          | High     |
| Campello <i>et al.</i> , 2010            | Yes                    | Yes           | Yes           | Yes     | Yes                          | High     |
| Campello <i>et al.</i> , 2011            | Yes                    | Yes           | Yes           | Yes     | Yes                          | High     |
| Cardenas-Mondragon <i>et al.</i> , 2015b | Yes                    | Yes           | Yes           | Yes     | Yes                          | High     |
| Carrascal <i>et al.</i> , 2003           | Yes                    | No            | Yes           | Yes     | Yes                          | Moderate |
| Casini <i>et al.</i> , 2005              | No                     | Yes           | No            | Yes     | Yes                          | Moderate |
| Chan <i>et al.</i> , 2016                | Yes                    | No            | Yes           | Yes     | Yes                          | Moderate |
| Chen <i>et al.</i> , 2016                | Yes                    | No            | No            | Yes     | Yes                          | Moderate |
| Chen <i>et al.</i> , 2017                | Yes                    | No            | Yes           | Yes     | No                           | Moderate |
| Chevaux <i>et al.</i> , 2010             | Yes                    | No            | Yes           | Yes     | Yes                          | Moderate |
| Cho <i>et al.</i> , 2001                 | Yes                    | No            | Yes           | Yes     | Yes                          | Moderate |
| Coelho <i>et al.</i> , 2013              | Yes                    | Yes           | Yes           | Yes     | Yes                          | High     |
| Cohen <i>et al.</i> , 2018b              | Yes                    | No            | Yes           | Yes     | Yes                          | Moderate |
| Dalla Libera <i>et al.</i> , 2020        | Yes                    | Yes           | Yes           | Yes     | No                           | Moderate |
| Damin <i>et al.</i> , 2007               | Yes                    | No            | Yes           | Yes     | Yes                          | Moderate |
| De Francisco <i>et al.</i> , 2018        | Yes                    | No            | Yes           | Yes     | Yes                          | Moderate |
| de Lima <i>et al.</i> , 2012b            | Yes                    | No            | Yes           | Yes     | No                           | Moderate |
| de Saussure <i>et al.</i> , 2004         | Yes                    | No            | Yes           | Yes     | Yes                          | Moderate |
| de Souza <i>et al.</i> , 2018            | Yes                    | No            | Yes           | Yes     | Yes                          | Moderate |
| de Villiers <i>et al.</i> , 2002         | No                     | No            | Yes           | Yes     | Yes                          | Moderate |
| de Villiers <i>et al.</i> , 2007         | Yes                    | Yes           | Yes           | Yes     | Yes                          | High     |



|                                          |     |     |     |     |     |          |
|------------------------------------------|-----|-----|-----|-----|-----|----------|
| Del Moral-Hernandez <i>et al.</i> , 2019 | No  | No  | Yes | Yes | Yes | Moderate |
| Deschoolmeester <i>et al.</i> , 2010     | Yes | No  | Yes | Yes | Yes | Moderate |
| Dimitroulia <i>et al.</i> , 2006         | Yes | Yes | No  | Yes | Yes | Moderate |
| Dimitroulia <i>et al.</i> , 2013         | Yes | Yes | Yes | Yes | No  | Moderate |
| Dinberg <i>et al.</i> , 2013             | Yes | No  | Yes | Yes | Yes | Moderate |
| do Carmo <i>et al.</i> , 2014            | Yes | No  | Yes | Yes | Yes | Moderate |
| El-Matary <i>et al.</i> , 2018           | Yes | No  | Yes | Yes | Yes | Moderate |
| Enam <i>et al.</i> , 2002                | No  | No  | No  | Yes | Yes | Low      |
| Esmailzadeh <i>et al.</i> , 2020         | Yes | Yes | Yes | Yes | Yes | High     |
| Eyre-Brook <i>et al.</i> , 1986          | No  | No  | Yes | Yes | Yes | Moderate |
| Fahal <i>et al.</i> , 1995               | Yes | Yes | Yes | Yes | No  | Moderate |
| Farmers <i>et al.</i> , 1973             | Yes | Yes | Yes | Yes | Yes | High     |
| Fernandes <i>et al.</i> , 2019           | No  | Yes | Yes | Yes | Yes | Moderate |
| Fiorina <i>et al.</i> , 2014             | Yes | Yes | Yes | Yes | Yes | High     |
| Flores <i>et al.</i> , 2014              | Yes | Yes | Yes | Yes | Yes | High     |
| Gauss <i>et al.</i> , 2015               | Yes | No  | Yes | Yes | Yes | Moderate |
| Gazzaz <i>et al.</i> , 2016              | Yes | No  | Yes | Yes | Yes | Moderate |
| Genitsch <i>et al.</i> , 2015            | Yes | No  | Yes | Yes | Yes | Moderate |
| Giuliani <i>et al.</i> , 2008            | Yes | No  | Yes | Yes | Yes | Moderate |
| Goel <i>et al.</i> , 2006                | Yes | No  | No  | Yes | Yes | Moderate |
| Gong <i>et al.</i> , 2019                | Yes | No  | Yes | Yes | Yes | Moderate |
| Gonzalez <i>et al.</i> , 2015            | Yes | No  | Yes | Yes | Yes | Moderate |
| Gordon <i>et al.</i> , 2016              | Yes | No  | Yes | Yes | Yes | Moderate |
| Gornick <i>et al.</i> , 2010             | Yes | Yes | Yes | Yes | Yes | High     |
| Green <i>et al.</i> , 1981               | Yes | Yes | Yes | Yes | Yes | High     |
| Greenberg <i>et al.</i> , 1978           | Yes | Yes | Yes | Yes | Yes | High     |
| Grinstein <i>et al.</i> , 2002           | No  | No  | Yes | Yes | Yes | Moderate |
| Gupta <i>et al.</i> , 2020               | Yes | No  | Yes | Yes | Yes | Moderate |
| Haga <i>et al.</i> , 1996                | No  | Yes | Yes | Yes | Yes | Moderate |
| Haghi-Navand <i>et al.</i> , 2019        | Yes | Yes | Yes | Yes | Yes | High     |
| Hamada <i>et al.</i> , 2014              | Yes | Yes | Yes | Yes | No  | Moderate |
| Hampras <i>et al.</i> , 2014             | Yes | Yes | No  | No  | Yes | Moderate |
| Hannigan <i>et al.</i> , 2018            | Yes | Yes | No  | Yes | Yes | Moderate |
| Harkins <i>et al.</i> , 2002             | No  | Yes | Yes | Yes | Yes | Moderate |
| Harsh <i>et al.</i> , 2017               | Yes | Yes | Yes | Yes | No  | Moderate |
| Hart <i>et al.</i> , 1982                | No  | No  | Yes | Yes | Yes | Moderate |
| Hayashi <i>et al.</i> , 1996             | Yes | No  | Yes | Yes | Yes | Moderate |
| He <i>et al.</i> , 2015                  | Yes | Yes | Yes | Yes | Yes | High     |
| Hernandez-Losa <i>et al.</i> , 2003      | No  | Yes | Yes | Yes | Yes | Moderate |
| Herrera-Goepfert <i>et al.</i> , 2005    | Yes | No  | Yes | Yes | Yes | Moderate |
| Hirata <i>et al.</i> , 2007              | Yes | Yes | Yes | Yes | Yes | High     |
| Hori <i>et al.</i> , 2005                | Yes | Yes | No  | Yes | Yes | Moderate |
| Hradsky <i>et al.</i> , 2015             | Yes | No  | Yes | Yes | Yes | Moderate |
| Hsieh <i>et al.</i> , 1998               | Yes | No  | Yes | Yes | Yes | Moderate |
| Huang <i>et al.</i> , 1978               | No  | Yes | Yes | Yes | Yes | Moderate |
| Iizuka <i>et al.</i> , 2001              | No  | Yes | Yes | Yes | Yes | Moderate |
| Ito <i>et al.</i> , 1992                 | Yes | Yes | Yes | Yes | Yes | High     |
| Jarzynski <i>et al.</i> , 2017           | Yes | No  | Yes | Yes | Yes | Moderate |
| Jung <i>et al.</i> , 2008                | Yes | No  | Yes | Yes | Yes | Moderate |
| Jung <i>et al.</i> , 2019                | Yes | No  | Yes | Yes | Yes | Moderate |
| Kambham <i>et al.</i> , 2004             | Yes | Yes | Yes | Yes | Yes | High     |
| Kamiza <i>et al.</i> , 2016              | Yes | Yes | Yes | Yes | Yes | High     |
| Kane <i>et al.</i> , 1971                | Yes | Yes | Yes | Yes | Yes | High     |
| Karbalaie-Niya <i>et al.</i> , 2018      | Yes | Yes | Yes | Yes | Yes | High     |
| Karim <i>et al.</i> , 2003               | Yes | No  | Yes | Yes | Yes | Moderate |
| Karpinski <i>et al.</i> , 2011           | Yes | No  | Yes | Yes | Yes | Moderate |

|                                          |     |     |     |     |     |          |
|------------------------------------------|-----|-----|-----|-----|-----|----------|
| Kattoor <i>et al.</i> , 2002             | Yes | No  | Yes | Yes | Yes | Moderate |
| Kawashima <i>et al.</i> , 2000           | No  | Yes | Yes | Yes | Yes | Moderate |
| Kayamba <i>et al.</i> , 2016             | Yes | Yes | Yes | Yes | Yes | High     |
| Keller <i>et al.</i> , 2014              | Yes | No  | No  | Yes | Yes | Moderate |
| Khabaz <i>et al.</i> , 2016              | Yes | Yes | Yes | Yes | Yes | High     |
| Kiewe <i>et al.</i> , 2009               | Yes | Yes | Yes | Yes | Yes | High     |
| Kim <i>et al.</i> , 2010                 | Yes | Yes | Yes | Yes | Yes | High     |
| Kim <i>et al.</i> , 2014                 | Yes | Yes | Yes | Yes | Yes | High     |
| Kirgan <i>et al.</i> , 1990              | Yes | Yes | Yes | Yes | Yes | High     |
| Kishore <i>et al.</i> , 2004             | Yes | No  | Yes | Yes | Yes | Moderate |
| Knoell <i>et al.</i> , 2005              | Yes | Yes | Yes | Yes | Yes | High     |
| Knosel <i>et al.</i> , 2004              | Yes | No  | Yes | Yes | Yes | Moderate |
| Knosel <i>et al.</i> , 2009              | Yes | Yes | Yes | Yes | Yes | High     |
| Kocoglu <i>et al.</i> , 2016             | Yes | Yes | Yes | Yes | Yes | High     |
| Kojima <i>et al.</i> , 2006              | No  | No  | Yes | Yes | Yes | Moderate |
| Kolho <i>et al.</i> , 2012               | Yes | Yes | No  | Yes | Yes | Moderate |
| Kong <i>et al.</i> , 2007                | No  | No  | Yes | Yes | Yes | Moderate |
| Ksiaa <i>et al.</i> , 2010               | Yes | Yes | Yes | Yes | Yes | High     |
| Ksiaa <i>et al.</i> , 2015               | Yes | No  | Yes | Yes | Yes | Moderate |
| Laghi <i>et al.</i> , 1999               | No  | No  | No  | Yes | Yes | Low      |
| Lavy <i>et al.</i> , 2001                | Yes | Yes | Yes | Yes | Yes | High     |
| Lee <i>et al.</i> , 2001                 | No  | Yes | Yes | Yes | Yes | Moderate |
| Leveque <i>et al.</i> , 2010             | Yes | No  | Yes | Yes | Yes | Moderate |
| Li <i>et al.</i> , 2007                  | Yes | Yes | Yes | Yes | Yes | High     |
| Li <i>et al.</i> , 2019                  | Yes | Yes | Yes | Yes | Yes | High     |
| Lin <i>et al.</i> , 2008                 | No  | No  | Yes | Yes | Yes | Moderate |
| Liu <i>et al.</i> , 2011                 | Yes | Yes | Yes | Yes | Yes | High     |
| Lu <i>et al.</i> , 2018                  | Yes | No  | Yes | Yes | Yes | Moderate |
| Lundstig <i>et al.</i> , 2007            | No  | No  | Yes | Yes | Yes | Moderate |
| Lv <i>et al.</i> , 2020                  | Yes | Yes | Yes | Yes | Yes | High     |
| MacKey <i>et al.</i> , 1979              | No  | No  | Yes | Yes | Yes | Moderate |
| Maconi <i>et al.</i> , 2005              | Yes | Yes | Yes | Yes | Yes | High     |
| Malekpour <i>et al.</i> , 2018           | Yes | No  | Yes | Yes | Yes | Moderate |
| Mariguela <i>et al.</i> , 2008           | No  | No  | Yes | Yes | Yes | Moderate |
| Mehrabani-Khasraghi <i>et al.</i> , 2016 | No  | Yes | Yes | Yes | Yes | Moderate |
| Militello <i>et al.</i> , 2009           | Yes | Yes | Yes | Yes | Yes | High     |
| Montgomery <i>et al.</i> , 1999          | Yes | Yes | Yes | Yes | Yes | High     |
| Morewaya <i>et al.</i> , 2004            | Yes | No  | Yes | Yes | Yes | Moderate |
| Mou <i>et al.</i> , 2012                 | Yes | Yes | No  | No  | Yes | Moderate |
| Nakatsu <i>et al.</i> , 2018             | Yes | Yes | No  | Yes | Yes | Moderate |
| Newcomb <i>et al.</i> , 2004             | Yes | Yes | Yes | Yes | Yes | High     |
| Niv <i>et al.</i> , 2010                 | No  | No  | No  | No  | Yes | Low      |
| Norman <i>et al.</i> , 2015              | Yes | Yes | Yes | Yes | Yes | High     |
| Nosho <i>et al.</i> , 2009               | Yes | No  | Yes | Yes | Yes | Moderate |
| Nosrati <i>et al.</i> , 2015             | Yes | Yes | No  | No  | Yes | Moderate |
| Oda <i>et al.</i> , 2003                 | Yes | No  | Yes | Yes | Yes | Moderate |
| Perez <i>et al.</i> , 2005               | Yes | Yes | Yes | Yes | Yes | High     |
| Perez-Brocal <i>et al.</i> , 2013        | No  | Yes | No  | No  | Yes | Low      |
| Perez-Brocal <i>et al.</i> , 2015        | No  | Yes | Yes | Yes | Yes | Moderate |
| Pironi <i>et al.</i> , 2009              | No  | No  | Yes | Yes | No  | Low      |
| Roblin <i>et al.</i> , 2011              | No  | No  | Yes | Yes | Yes | Moderate |
| Roblin <i>et al.</i> , 2012              | Yes | No  | Yes | Yes | Yes | Moderate |
| Roche <i>et al.</i> , 1981               | No  | No  | No  | Yes | Yes | Low      |
| Rollison <i>et al.</i> , 2009            | Yes | Yes | Yes | Yes | Yes | High     |
| Ruger <i>et al.</i> , 1985               | No  | No  | Yes | Yes | Yes | Moderate |
| Ryan <i>et al.</i> , 2012                | No  | Yes | Yes | Yes | Yes | Moderate |

|                                     |     |     |     |     |     |          |
|-------------------------------------|-----|-----|-----|-----|-----|----------|
| Salepci <i>et al.</i> , 2009        | Yes | Yes | Yes | Yes | Yes | High     |
| Samaka <i>et al.</i> , 2013         | Yes | Yes | No  | Yes | Yes | Moderate |
| Sarvari <i>et al.</i> , 2018        | Yes | Yes | Yes | Yes | Yes | High     |
| Schildgen <i>et al.</i> , 2013      | No  | No  | Yes | Yes | Yes | Moderate |
| Shah <i>et al.</i> , 1992           | Yes | No  | Yes | Yes | Yes | Moderate |
| Shibata <i>et al.</i> , 1993        | Yes | No  | Yes | Yes | Yes | Moderate |
| Sinagra <i>et al.</i> , 2014        | No  | Yes | Yes | Yes | Yes | Moderate |
| Su <i>et al.</i> , 2020             | Yes | Yes | Yes | Yes | Yes | High     |
| Sura <i>et al.</i> , 2010           | No  | Yes | Yes | Yes | Yes | Moderate |
| Tafvizi <i>et al.</i> , 2014        | Yes | Yes | Yes | Yes | Yes | High     |
| Tafvizi <i>et al.</i> , 2015        | Yes | Yes | Yes | Yes | Yes | High     |
| Taherian <i>et al.</i> , 2014       | Yes | Yes | Yes | Yes | Yes | High     |
| Theodoropoulos <i>et al.</i> , 2005 | Yes | Yes | Yes | Yes | Yes | High     |
| Tolentino <i>et al.</i> , 2008      | Yes | No  | Yes | Yes | Yes | Moderate |
| Toumi <i>et al.</i> , 2017          | No  | No  | Yes | Yes | Yes | Moderate |
| Trimeche <i>et al.</i> , 2009       | Yes | No  | Yes | Yes | Yes | Moderate |
| Truong <i>et al.</i> , 2009         | Yes | No  | Yes | Yes | Yes | Moderate |
| Tsai <i>et al.</i> , 2015           | No  | Yes | No  | No  | Yes | Low      |
| Ungaro <i>et al.</i> , 2019         | No  | No  | Yes | Yes | Yes | Moderate |
| Vanoli <i>et al.</i> , 2017         | No  | No  | Yes | Yes | Yes | Moderate |
| Vega <i>et al.</i> , 1999           | No  | No  | Yes | Yes | Yes | Moderate |
| Vilkin <i>et al.</i> , 2012         | Yes | Yes | No  | No  | Yes | Moderate |
| Wagner <i>et al.</i> , 2013         | No  | No  | No  | Yes | Yes | Low      |
| Wakefield <i>et al.</i> , 1992      | Yes | Yes | Yes | Yes | Yes | High     |
| Weinreb <i>et al.</i> , 2006        | Yes | No  | Yes | Yes | Yes | Moderate |
| Wong <i>et al.</i> , 2003           | No  | No  | Yes | Yes | Yes | Moderate |
| Yanai <i>et al.</i> , 1997          | No  | No  | Yes | Yes | Yes | Moderate |
| Yanai <i>et al.</i> , 1999          | No  | Yes | Yes | Yes | Yes | Moderate |
| Yavuzer <i>et al.</i> , 2011        | Yes | Yes | No  | Yes | Yes | Moderate |
| Yi <i>et al.</i> , 2013             | Yes | Yes | Yes | Yes | Yes | High     |
| Yuen <i>et al.</i> , 1994           | No  | No  | Yes | Yes | Yes | Moderate |
| Yunos <i>et al.</i> , 2006          | No  | No  | Yes | Yes | Yes | Moderate |
| Zagorowicz <i>et al.</i> , 2016     | Yes | No  | Yes | Yes | Yes | Moderate |
| Zapatka <i>et al.</i> , 2020        | No  | No  | Yes | Yes | Yes | Moderate |
